# Supplementary material
Source: HighWire-hosted journal article supplement (https://jnm.snmjournals.org/highwire/filestream/102695/field_highwire_adjunct_files/0/256784_Supplemental_Data.pdf)
Supplement: 256784_Supplemental_Data.pdf [file 256784_Supplemental_Data.pdf]

**Supplemental Table 1.** Demographic, Clinical and Histopathologic Characteristics of Arm A (Conventional Imaging only) Study Participants (n=82).

|                                                            |                   |
|------------------------------------------------------------|-------------------|
| <b>Age (years)</b>                                         |                   |
| Mean (SD)                                                  | 61.7 (7.5)        |
| <b>PSA prior to radiotherapy (ng/mL)</b>                   |                   |
| Median (range)                                             | 0.34 (0.01-27.14) |
| <b>Gleason score (GS), n (%)</b>                           |                   |
| GS 3+3 (Grade group 1)                                     | 4 (4.8)           |
| GS 3+4 (Grade group 2)                                     | 30 (36.6)         |
| GS 4+3 (Grade group 3)                                     | 19 (23.2)         |
| GS ≥ 4+4 (Grade groups 4 and 5)                            | 29 (35.4)         |
| <b>Primary tumor stage, n (%)</b>                          |                   |
| T1-T2                                                      | 35 (42.7)         |
| T3-T4                                                      | 47 (57.3)         |
| Extracapsular extension, n (%)                             | 43 (52.4)         |
| Seminal vesicle invasion, n (%)                            | 22 (26.8)         |
| Margin positive, n (%)                                     | 41 (50.0)         |
| Node positive, n (%)                                       | 14 (17.1)         |
| <b>Prostatectomy-Conventional Imaging Interval (years)</b> |                   |
| Median (range)                                             | 0.94 (0.08-21.22) |
| Androgen deprivation therapy, n (%)                        | 28 (34.6)         |
| <b>Radiotherapy Decisions*</b>                             |                   |
| Prostate bed only                                          | 56                |
| Prostate bed and pelvic nodes                              | 25                |

\*In total, 81 patients in Arm A received radiotherapy.
